# Supplementary material for: Drug screening in human physiologic medium identifies uric acid as an inhibitor of rigosertib efficacy
Source: PubMed Central journal article supplement (PMC11383364; doi:10.1172/jci.insight.174329), 2024-05-30
Supplement: jciinsight-9-174329-s023.pdf [file jciinsight-9-174329-s023.pdf]

Full unedited gel for Figure 2f

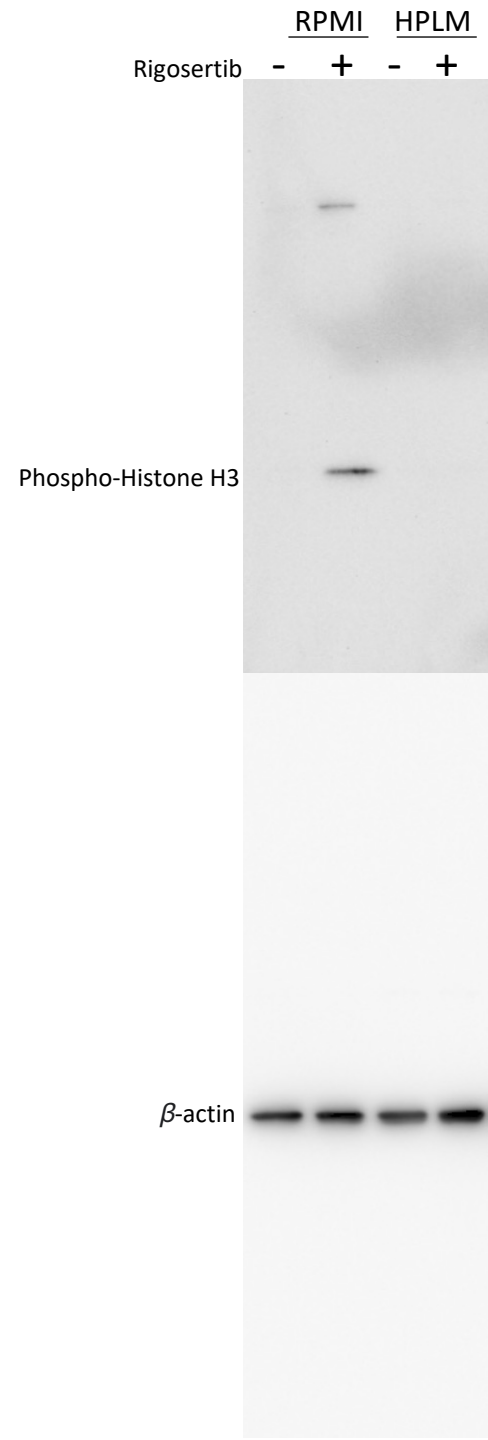

*Antibody used*

*phospho-Histone H3 (Cell Signaling, 3377S)*

*$\beta$ -actin-(Sigma, A1978)*

# Full unedited gel for Figure 3h

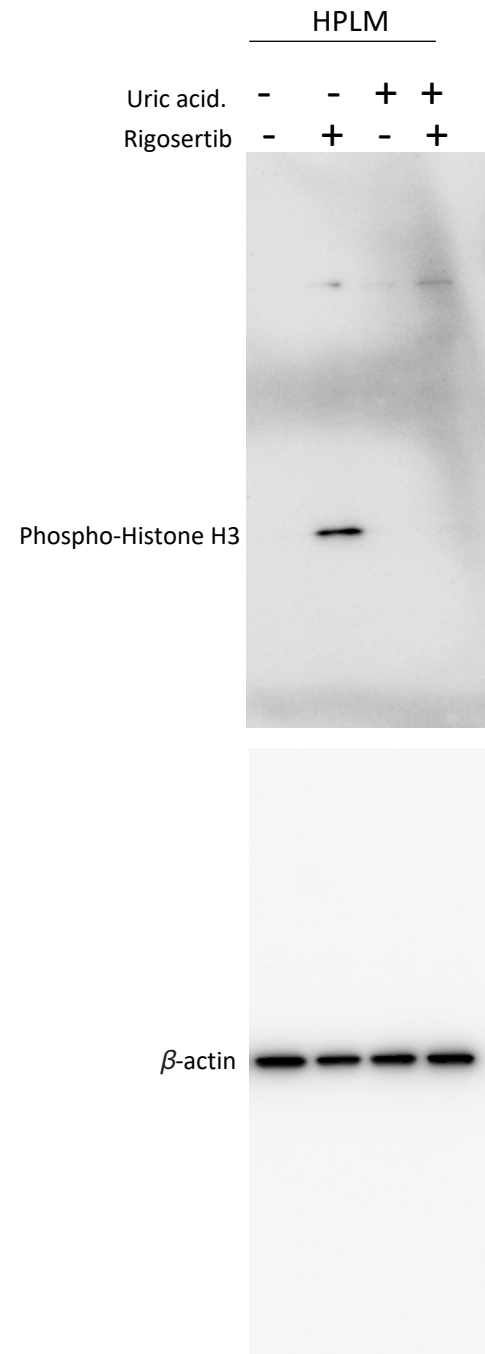

*Antibody used:*

*phospho-Histone H3 (Cell Signaling, 3377S*

*$\beta$ -actin-(Sigma, A1978)*

Full unedited gel for Figure 4a

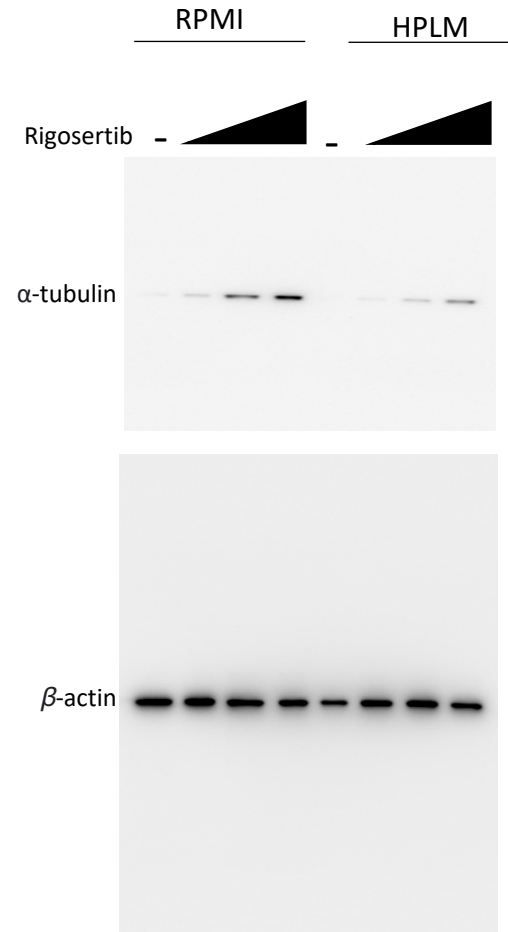

*Antibody used:*

*$\alpha$ -tubulin (Sigma, T9026)*

*$\beta$ -actin-(Sigma, A1978)*

Full unedited gel for Figure 4c

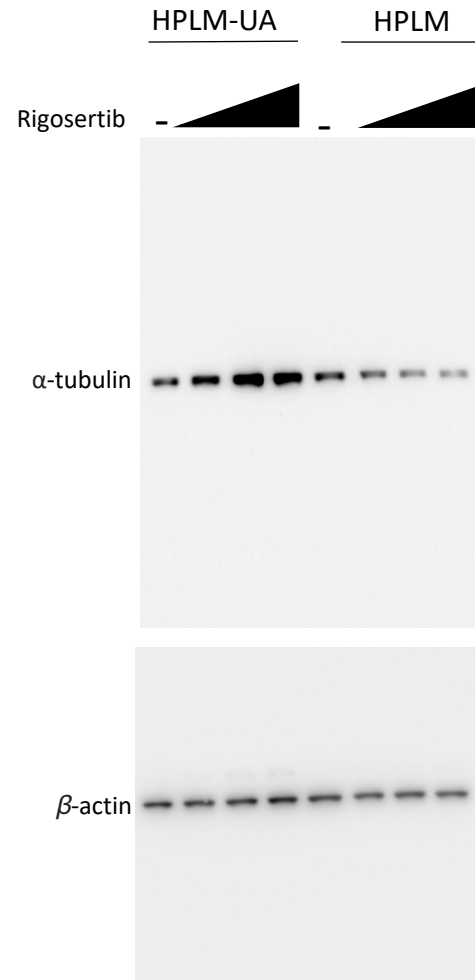

*Antibody used:*

*$\alpha$ -tubulin (Sigma, T9026)*

*$\beta$ -actin-(Sigma, A1978)*

Full unedited gel for Figure 4i

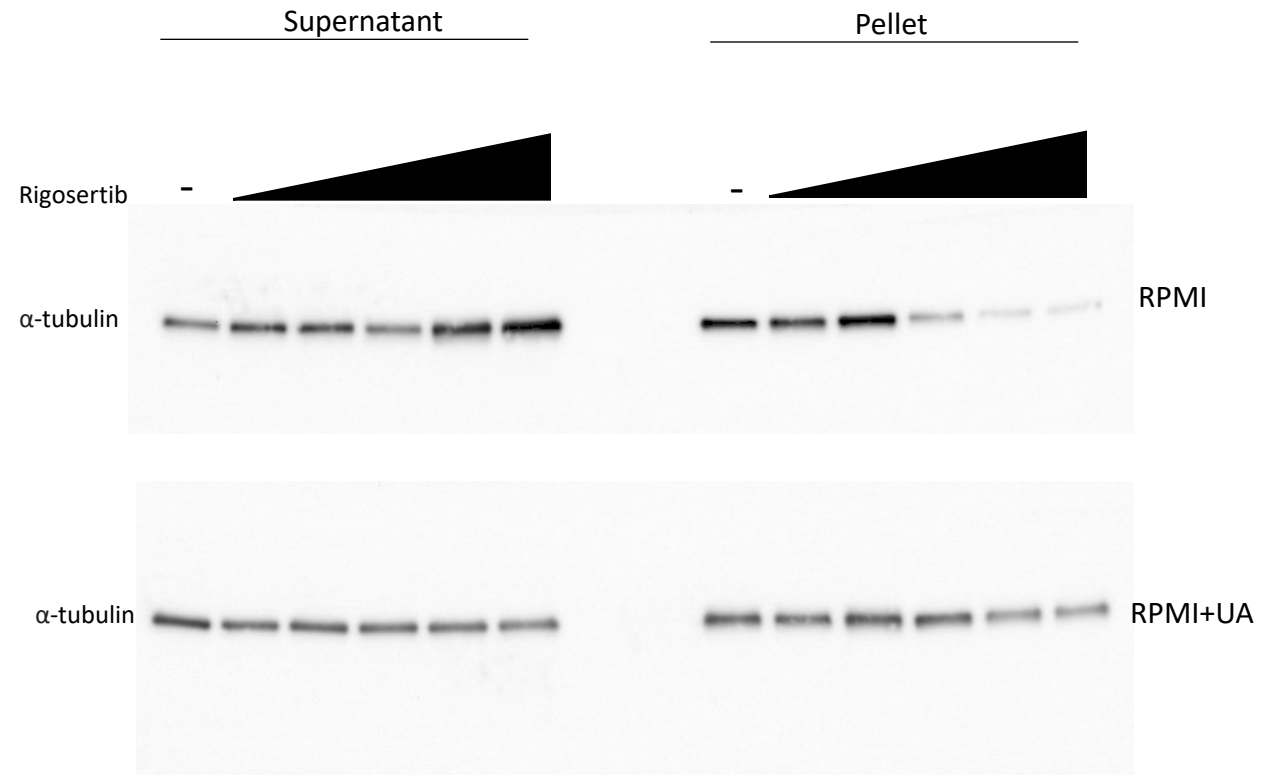

*Antibody used:  
α-tubulin (Sigma, T9026)*

# Full unedited gel for Figure 5d

|            | 37 |   |   |   | 56 |   |   |   | 60 |   |   |   |
|------------|----|---|---|---|----|---|---|---|----|---|---|---|
| Rigosertib | -  | + | - | + | -  | + | - | + | -  | + | - | + |
| Uric acid  | -  | - | + | + | -  | - | + | + | -  | + | + | + |

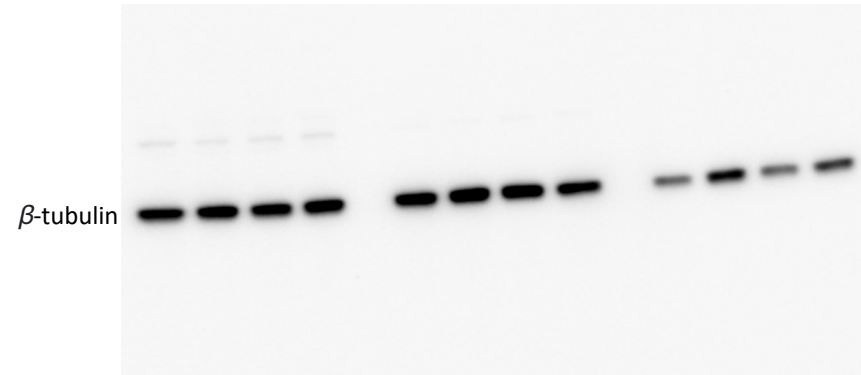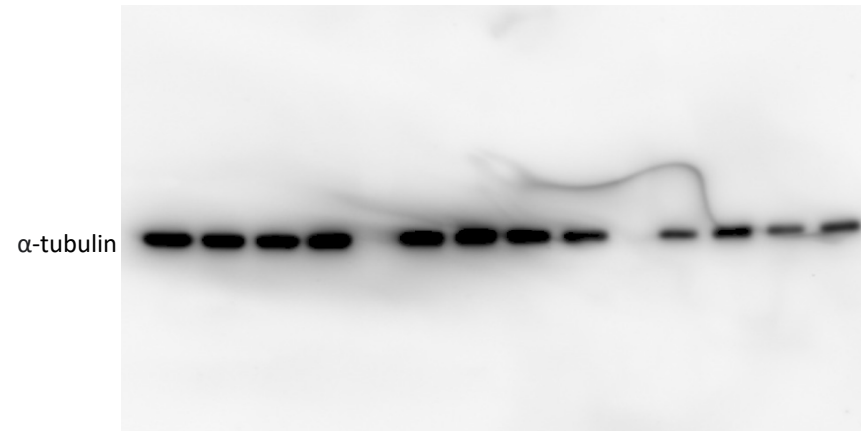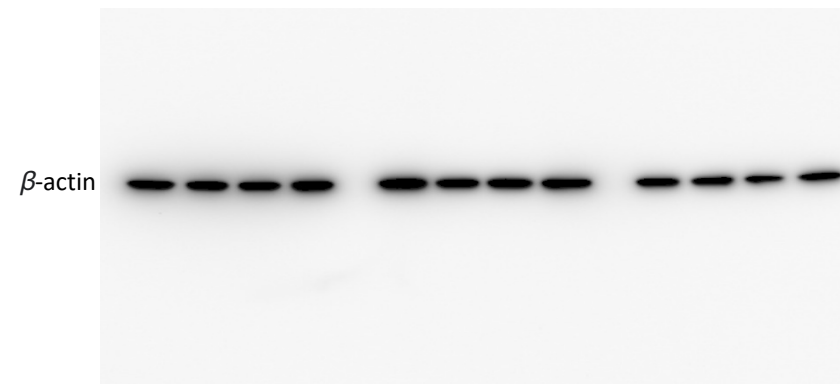

*Antibody used:*

*$\alpha$ -tubulin (Sigma, T9026)*

*$\beta$ -tubulin (Cell Signaling, 2146S)*

*$\beta$ -actin-(Sigma, A1978)*

Full unedited gel for Figure S3a

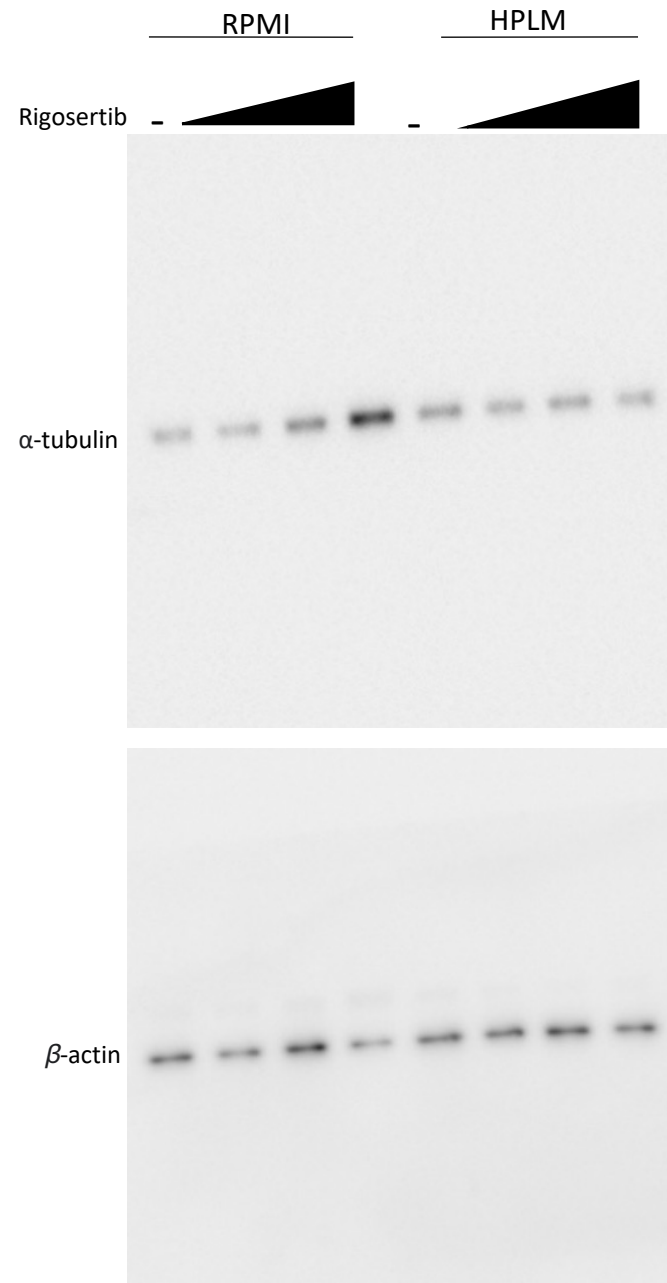

*Antibody used:*

*$\alpha$ -tubulin (Sigma, T9026)*

*$\beta$ -actin-(Sigma, A1978)*

Full unedited gel for Figure S3c

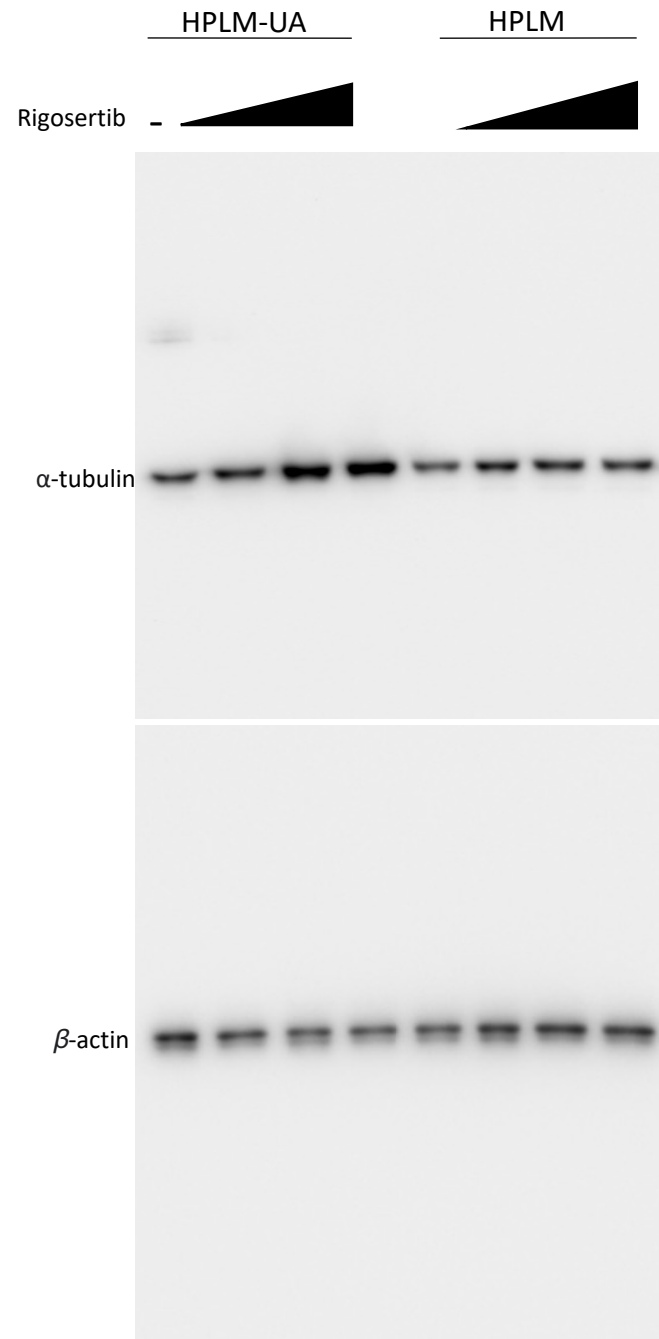

*Antibody used:*

*$\alpha$ -tubulin (Sigma, T9026)*

*$\beta$ -actin-(Sigma, A1978)*
